# Supplementary material for: Spatial and seasonal variability in volatile organic sulfur compounds in seawater and overlying atmosphere of the Bohai and Yellow Seas
Source: Copernicus journal article supplement (doi:10.5194/bg-2023-97), 2023-06-12
Supplement: Supplementary file 1 [file bg-2023-97-supplement.pdf]

# Supplement

## **Spatial and seasonal variability in volatile organic sulfur compounds in seawater and overlying atmosphere of the Bohai and Yellow Seas**

Juan Yu<sup>1,2,3,†</sup>, Lei Yu<sup>1,†</sup>, Zhen He<sup>1,2,3</sup>, Gui-Peng Yang<sup>1,2,3,\*</sup>, Jing-Guang Lai<sup>1</sup>, Qian Liu<sup>1</sup>

<sup>1</sup>Frontiers Science Center for Deep Ocean Multispheres and Earth System, Key Laboratory of Marine Chemistry Theory and Technology, Ministry of Education, Ocean University of China, Qingdao 266100, China.

<sup>2</sup>Laboratory for Marine Ecology and Environmental Science, Qingdao National Laboratory for Marine Science and Technology, Qingdao 266237, China.

<sup>3</sup>Institute of Marine Chemistry, Ocean University of China, Qingdao 266100, China.

\*Corresponding author: G.-P. Yang (gpyang@mail.ouc.edu.cn)

†These authors contributed equally to this work and should be considered co-first authors.

### **Contents of this file**

Figures S1 to S2

Tables S1 to S4

### **Introduction**

This supporting information provides the nitrate distribution, 72 h backward trajectory of the air mass, the pre-concentrator parameters of the three-stage cold trap, the calculation formulas for Henry's constant, and correlation analyses of the three VSCs and environmental factors in the BS and YS in spring and summer 2018. The data are also available for download at <https://doi.org/10.6084/m9.figshare.14971644>.

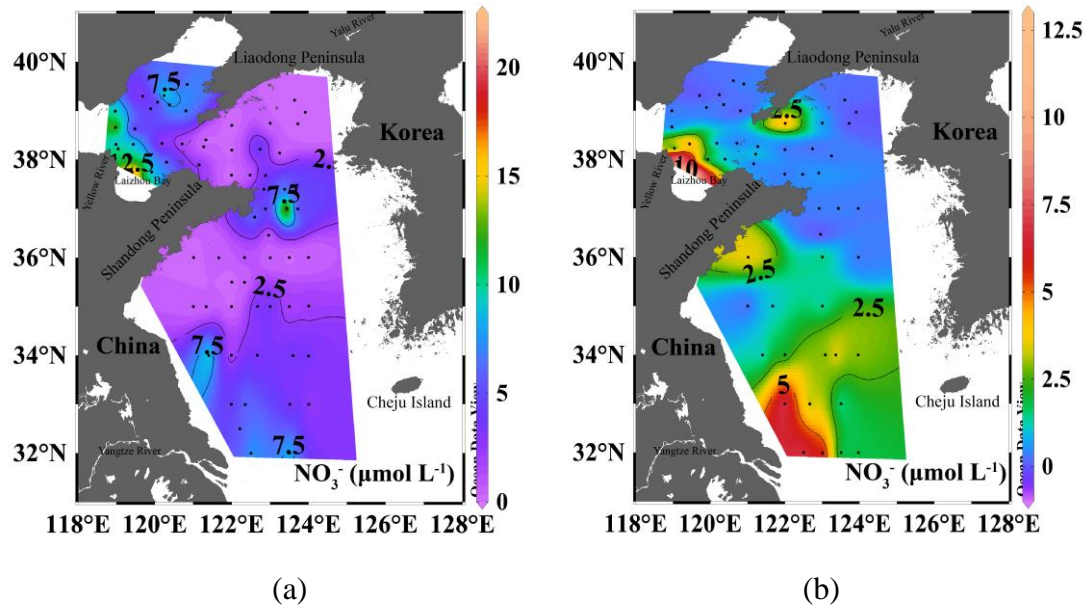

Figure S1. Spatial distributions of nitrate in the surface water of the BS and YS in spring (a) and summer (b).

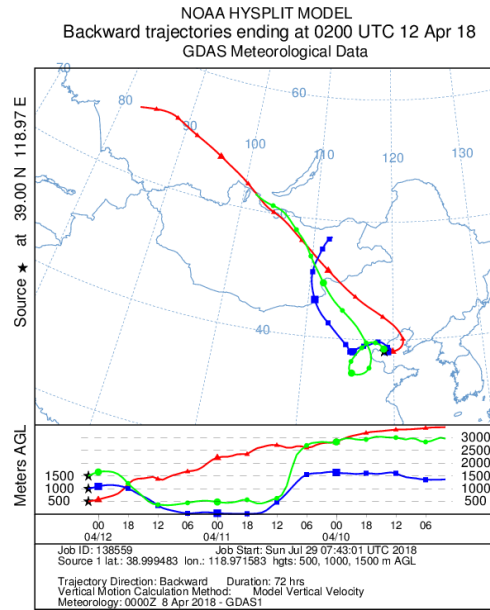

Figure S2. 72 h backward trajectory of the air mass above station B49 in the BS in spring 2018.

**Table S1.** The pre-concentrator parameters of the three-stage cold trap.

| Stage | Adsorbent    | Trapping<br>temperature<br><i>T</i> /°C | Preheating<br>temperature<br><i>T</i> /°C | Stripping<br>temperature<br><i>T</i> /°C | Baking<br>temperature<br><i>T</i> /°C | Baking<br>time. <i>t</i> /min |
|-------|--------------|-----------------------------------------|-------------------------------------------|------------------------------------------|---------------------------------------|-------------------------------|
| 1     | Glass beads  | -170                                    | 20                                        | 10                                       | 150                                   | 2                             |
| 2     | Tenax        | -50                                     | -                                         | 170                                      | 180                                   | 2                             |
| 3     | Cryotrapping | -150                                    | -                                         | 120                                      | 100                                   | 2                             |

**Table S2.** The calculation formulas for Henry's constant.

|                 | Henry's constant calculation                 | Parameter                                                                             |
|-----------------|----------------------------------------------|---------------------------------------------------------------------------------------|
| COS             | $H = C_1 \text{ EXP}[C_2 (1/T-1/T^{\circ})]$ | $C_1 = 2.2 \times 10^{-2} \text{ mol L}^{-1} \text{ atm}^{-1}$ ; $C_2 = 2100\text{K}$ |
| DMS             | $H = C_1 \text{ EXP}[C_2 (1/T-1/T^{\circ})]$ | $C_1 = 4.8 \times 10^{-2} \text{ mol L}^{-1} \text{ atm}^{-1}$ ; $C_2 = 3500\text{K}$ |
| CS <sub>2</sub> | $H = C_1 \text{ EXP}[C_2 (1/T-1/T^{\circ})]$ | $C_1 = 5.5 \times 10^{-2} \text{ mol L}^{-1} \text{ atm}^{-1}$ ; $C_2 = 2800\text{K}$ |

**Table S3.** Correlation analyses of the three VSCs and environmental factors in the BS and YS in spring.

|                     | COS     | DMS     | CS <sub>2</sub> | COS (g) | DMS (g) | CS <sub>2</sub> (g) |
|---------------------|---------|---------|-----------------|---------|---------|---------------------|
| COS                 | 1       |         |                 |         |         |                     |
| DMS                 | 0.021   | 1       |                 |         |         |                     |
| CS <sub>2</sub>     | 0.193   | 0.281*  | 1               |         |         |                     |
| COS (g)             | -0.246  | -0.355  | -0.182          | 1       |         |                     |
| DMS (g)             | 0.296   | 0.040   | 0.274           | 0.117   | 1       |                     |
| CS <sub>2</sub> (g) | -0.201  | -0.264  | -0.213          | 0.554** | -0.013  | 1                   |
| Chl a               | 0.132   | 0.044   | -0.095          | 0.033   | 0.179   | -0.141              |
| Temperature         | 0.286*  | 0.082   | 0.319**         | -0.257  | 0.179   | -0.372              |
| Salinity            | 0.110   | -0.009  | -0.109          | 0.240   | 0.019   | 0.236               |
| Silicate            | -0.103  | -0.252* | -0.029          | 0.351   | -0.008  | 0.540               |
| Phosphate           | -0.084  | -0.205  | -0.353**        | 0.621   | -0.128  | 0.360               |
| Nitrate             | -0.299* | -0.293* | -0.226          | 0.075   | -0.096  | 0.044               |
| DOC                 | -0.146  | -0.153  | -0.073          | 0.037   | -0.122  | 0.008               |

\* indicates  $P < 0.05$ , \*\* indicates  $P < 0.01$ .

**Table S4.** Correlation analyses of the three VSCs and environmental factors in the BS and YS in summer.

|                     | COS    | DMS     | CS <sub>2</sub> | COS (g) | DMS (g) | CS <sub>2</sub> (g) |
|---------------------|--------|---------|-----------------|---------|---------|---------------------|
| COS                 | 1      |         |                 |         |         |                     |
| DMS                 | 0.009  | 1       |                 |         |         |                     |
| CS <sub>2</sub>     | -0.007 | 0.424** | 1               |         |         |                     |
| COS (g)             | 0.358  | 0.472   | 0.184           | 1       |         |                     |
| DMS (g)             | -0.266 | 0.404   | 0.310           | 0.451   | 1       |                     |
| CS <sub>2</sub> (g) | 0.452  | 0.229   | 0.424           | 0.855** | 0.251   | 1                   |
| Chl a               | -0.059 | 0.250   | 0.274*          | 0.461   | -0.294  | 0.565               |
| Temperature         | 0.088  | -0.076  | -0.143          | -0.097  | -0.349  | 0.072               |
| Salinity            | 0.128  | -0.172  | -0.143          | -0.120  | -0.352  | -0.044              |
| Silicate            | 0.114  | 0.122   | 0.276*          | 0.312   | -0.548  | 0.377               |
| Phosphate           | 0.104  | -0.169  | -0.245          | -0.490  | -0.539  | -0.482              |
| Nitrate             | -0.095 | 0.145   | 0.057           | -0.008  | 0.224   | -0.155              |
| DOC                 | 0.342* | -0.015  | 0.012           | 0.020   | 0.924   | 0.319               |

\* indicates  $P < 0.05$ , \*\* indicates  $P < 0.01$ .
